# Supplementary material for: Enhanced detection of prion infectivity from blood by preanalytical enrichment with peptoid-conjugated beads
Source: PubMed Central journal article supplement (PMC6742390; doi:10.1371/journal.pone.0216013), 2019-09-12
Supplement: pone.0216013.s007.pdf [file pone.0216013.s007.pdf]

**S1 Table: Location of PSR1 beads in body fluids from mice inoculated with 3  $\mu$ l beads coated with plasma from prion-infected hamster per mouse.** Yes: beads were present in these body fluids. No: no beads were observed. n.a.: non-analyzed. dpi: days post infection. The analysis was only performed for the indicated mice.

| mouse No. | dpi | body fluids |             |                       |       |       |      |
|-----------|-----|-------------|-------------|-----------------------|-------|-------|------|
|           |     | CSF         | blood smear | blood 500-700 $\mu$ l | urine | feces | gall |
| 1902-1    | 95  | yes         | n.a.        | n.a.                  | n.a.  | n.a.  | n.a. |
| 1902-2    | 97  | yes         | n.a.        | n.a.                  | n.a.  | n.a.  | n.a. |
| 1902-3    | 100 | yes         | no          | no                    | n.a.  | n.a.  | n.a. |
| 1902-4    | 173 | no          | no          | n.a.                  | yes   | yes   | yes  |
| 1904B-1   | 98  | yes         | n.a.        | n.a.                  | n.a.  | n.a.  | n.a. |
| 1905-3    | 100 | yes         | no          | no                    | n.a.  | n.a.  | n.a. |
| 1905-4    | 100 | no          | no          | no                    | n.a.  | n.a.  | n.a. |
| 1906-1    | 96  | yes         | no          | no                    | n.a.  | n.a.  | n.a. |
| 1906-2    | 103 | yes         | no          | no                    | n.a.  | n.a.  | n.a. |
| 1906-3    | 108 | yes         | no          | n.a.                  | n.a.  | n.a.  | n.a. |
| 1906-4    | 116 | yes         | no          | n.a.                  | n.a.  | n.a.  | n.a. |
| 1907-1    | 96  | yes         | no          | no                    | n.a.  | n.a.  | n.a. |
| 1907-2    | 107 | yes         | no          | n.a.                  | n.a.  | n.a.  | n.a. |
| 1910-1    | 70  | yes         | no          | no                    | n.a.  | n.a.  | n.a. |
| 1911-1    | 48  | yes         | no          | n.a.                  | n.a.  | n.a.  | n.a. |
| 1911-2    | 81  | yes         | no          | n.a.                  | yes   | n.a.  | yes  |
| 1911-3    | 82  | yes         | no          | n.a.                  | yes   | n.a.  | yes  |
| 1912-2    | 37  | yes         | no          | no                    | n.a.  | n.a.  | n.a. |
| 1913-1    | 76  | n.a.        | n.a.        | n.a.                  | no    | yes   | n.a. |
| 1913-2    | 78  | yes         | no          | n.a.                  | no    | yes   | n.a. |
| 1913-3    | 78  | yes         | no          | n.a.                  | no    | yes   | n.a. |
| 1913-4    | 79  | yes         | no          | n.a.                  | no    | yes   | n.a. |
