# Supplementary material for: Enhanced detection of prion infectivity from blood by preanalytical enrichment with peptoid-conjugated beads
Source: PubMed Central journal article supplement (PMC6742390; doi:10.1371/journal.pone.0216013), 2019-09-12
Supplement: pone.0216013.s008.pdf [file pone.0216013.s008.pdf]

**S2 Table: Presence of PSR1 beads in various tissue homogenates from mice inoculated with 3  $\mu$ l beads coated with plasma from prion-infected hamster per mouse.** Yes: beads were found in these homogenates. No: no beads were observed. n.a.: non-analyzed. dpi: days post infection. The analysis was only performed for the indicated mice.

| mouse No. | dpi | Homogenates |             |        |        |      |       |       |
|-----------|-----|-------------|-------------|--------|--------|------|-------|-------|
|           |     | brain       | spinal cord | spleen | kidney | lung | liver | heart |
| 1902-1    | 95  | yes         | n.a.        | yes    | n.a.   | n.a. | n.a.  | n.a.  |
| 1902-2    | 97  | yes         | n.a.        | yes    | n.a.   | n.a. | n.a.  | n.a.  |
| 1902-3    | 100 | yes         | yes         | yes    | no     | no   | no    | no    |
| 1904B-1   | 98  | yes         | n.a.        | no     | n.a.   | n.a. | n.a.  | n.a.  |
| 1905-1    | 89  | yes         | n.a.        | no     | n.a.   | n.a. | n.a.  | n.a.  |
| 1905-2    | 91  | yes         | n.a.        | yes    | n.a.   | n.a. | n.a.  | n.a.  |
| 1905-3    | 100 | n.a.        | no          | n.a.   | n.a.   | n.a. | no    | n.a.  |
| 1905-4    | 100 | n.a.        | no          | n.a.   | n.a.   | n.a. | no    | n.a.  |
| 1906-1    | 96  | yes         | n.a.        | yes    | n.a.   | n.a. | n.a.  | n.a.  |
| 1906-2    | 103 | n.a.        | no          | n.a.   | n.a.   | n.a. | no    | n.a.  |
| 1906-3    | 108 | n.a.        | yes         | n.a.   | no     | n.a. | no    | no    |
| 1906-4    | 116 | n.a.        | yes         | n.a.   | no     | yes  | no    | no    |
| 1907-1    | 96  | yes         | n.a.        | yes    | n.a.   | n.a. | n.a.  | n.a.  |
| 1910-1    | 70  | yes         | n.a.        | yes    | n.a.   | n.a. | n.a.  | n.a.  |
| 1911-1    | 48  | n.a.        | yes         | n.a.   | no     | no   | yes   | n.a.  |
| 1912-2    | 37  | n.a.        | yes         | n.a.   | n.a.   | n.a. | no    | n.a.  |
