# Supplementary material for: Enhanced detection of prion infectivity from blood by preanalytical enrichment with peptoid-conjugated beads
Source: PubMed Central journal article supplement (PMC6742390; doi:10.1371/journal.pone.0216013), 2019-09-12
Supplement: pone.0216013.s011.pdf [file pone.0216013.s011.pdf]

**S5 Table. Mortality of hamster and mice that occurred outside of planned euthanasia or humane endpoints.**

| Experiment                                       | Animals                                                                                                                                                                                                                                                                                                                                                                                         |
|--------------------------------------------------|-------------------------------------------------------------------------------------------------------------------------------------------------------------------------------------------------------------------------------------------------------------------------------------------------------------------------------------------------------------------------------------------------|
| Pilot experiment bead toxicity for bead toxicity | <p>4 <i>Tga20</i> mice died directly after inoculation, because of anesthetics' side effects.</p> <p>1 <i>Tga20</i> mice died at 8 dpi of an intercurrent death.</p>                                                                                                                                                                                                                            |
| Inoculation of hamster with 263K prions          | No unexpected deaths of hamster were observed.                                                                                                                                                                                                                                                                                                                                                  |
| Bead based PrP <sup>Sc</sup> capture assays      | <p>7 <i>TgSHaPrP</i> mice died directly after inoculation, because of anesthetics' side effects.</p> <p>2 <i>Tga20</i> mice died at 141 and 247 dpi (from total 72 mice) of an intercurrent death.</p> <p>6 <i>TgSHaPrP</i> mice (from total 99 mice) died outside the humane endpoint on scrapie (Score 2, Table S4), because of unexpected fast progression of disease in the last hours.</p> |
